# Supplementary figures and images for: In vivo analysis of trypanosome mitochondrial RNA function by artificial site-specific RNA endonuclease-mediated knockdown
Source: PubMed Central journal article supplement — RNA. 2015 Oct;21(10):1781–9. doi: 10.1261/rna.052084.115 (PMC4574754; doi:10.1261/rna.052084.115), 2015-10

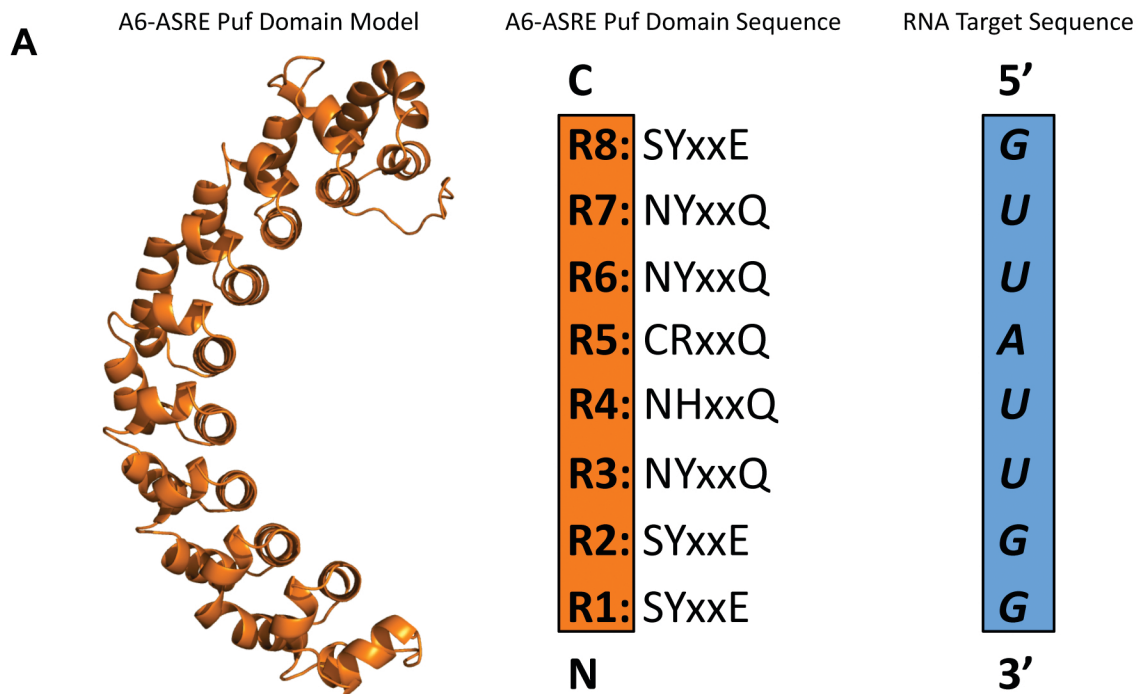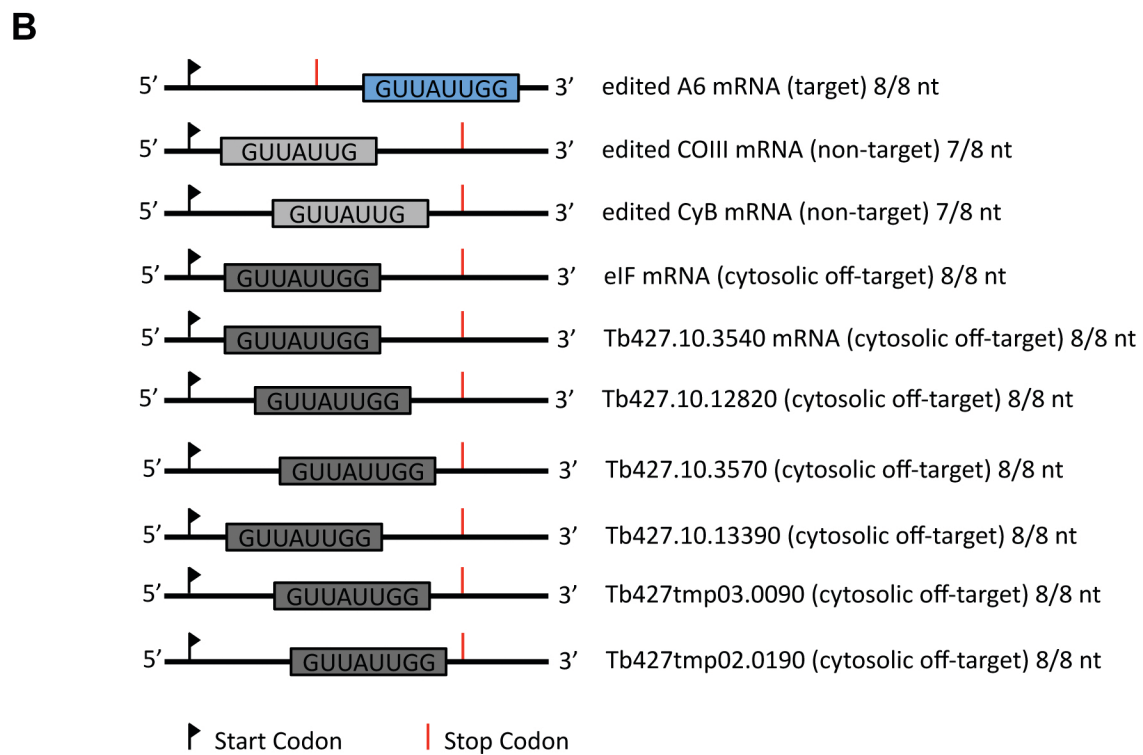

Supplemental Figure 1

Supplement: supp_052084.115_Supp_Fig_1.pdf [file supp_052084.115_Supp_Fig_1.pdf]

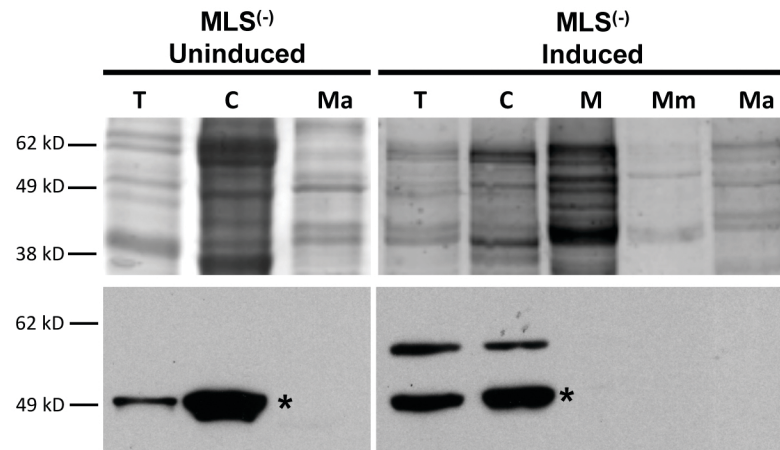

Supplemental Figure 2

Supplement: supp_052084.115_Supp_Fig_2.pdf [file supp_052084.115_Supp_Fig_2.pdf]

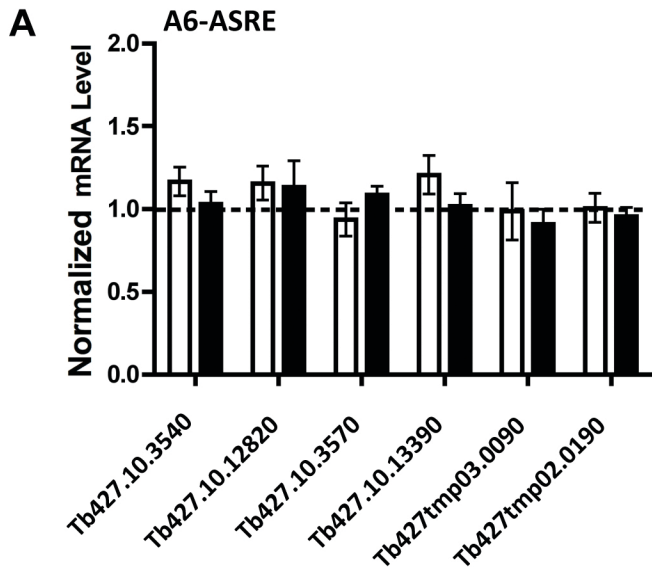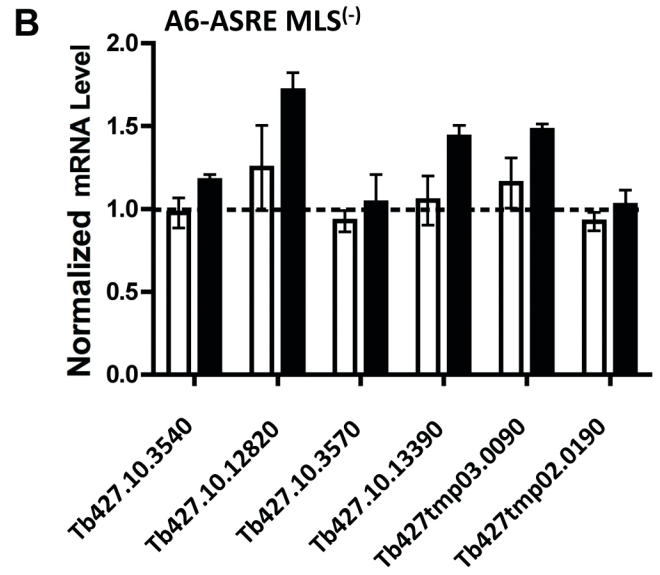

Supplemental Figure 3

Supplement: supp_052084.115_Supp_Fig_3.pdf [file supp_052084.115_Supp_Fig_3.pdf]
